# Supplementary material
Source: Springer Nature journal article supplement (https://www.springermedizin.de/resource/supplementary/12955_2010_682_MOESM2_ESM.pdf/9561082)
Supplement: MOESM2 [file 9561082]

A total of 1316 patients were admitted to the stroke unit

Excluded (n=1061)

- inclusion criteria not met  
(n=911)

- declined the participation  
(n=150)

Included (n=255)

Intervention group (n=90)

Control group (n=165)

Lost to follow-up (n=17):

- withdraw from informed-consent  
(n=12)

- moving to another town (n=1)

- transfer to a nursing home (n=2)

- no specific reason (n=2)

death (n=1)

Outcome data

Lost to follow up (n=8):

- withdraw from informed consent  
(n=1)

- moving to another town (n=1)

- transfer to a nursing home (n=2)

- no specific reason (n=4)

death (n=5)

Outcome data
